# Supplementary material for: A Lateral Flow Assay for the Detection of Leptospira lipL32 Gene Using CRISPR Technology
Source: MDPI journal article supplement (doi:10.3390/s23146544), 2023-07-20
Supplement: s1 [file s1]

## Supplementary Information

# A Lateral Flow Assay for the Detection of *Leptospira lipL32* Gene Using CRISPR Technology

Satheesh Natarajan <sup>1,\*</sup>, Jayaraj Joseph <sup>2</sup>, Balamurugan Vinayagamurthy <sup>3</sup> and Pedro Estrela <sup>4,5</sup>

<sup>1</sup> Healthcare Technology Innovation Centre, Indian Institute of Technology Madras, Chennai 600113, India

<sup>2</sup> Department of Electrical Engineering, Indian Institute of Technology Madras, Chennai 600036, India;  
jayaraj@ee.iitm.ac.in

<sup>3</sup> Indian Council of Agricultural Research-National Institute of Veterinary Epidemiology and Disease Informatics (ICAR-NIVEDI), Bangalore 560064, India;  
b.vinayagamurthy@icar.gov.in

<sup>4</sup> Department of Electronic and Electrical Engineering, University of Bath, Bath BA2 7AY, UK;  
p.estrela@bath.ac.uk

<sup>5</sup> Centre for Bioengineering & Biomedical Technologies, University of Bath, Bath BA2 7AY, UK

\* Correspondence: satheesh@htic.iitm.ac.in

### Protocol for CRISPR/Cas-based LFIA for *lipL32* gene

#### 1. Preparation of CRISPR-Cas9 crRNAs

| Reagents               | Volume      | Final concentration |
|------------------------|-------------|---------------------|
| Forward Oligo (100 mM) | 1.25 µL     | 2.5 µM              |
| Reverse Oligo (100 mM) | 1.25 µL     | 2.5 µM              |
| Total volume           | Up to 50 µL |                     |

### Synthesis of *in vitro* transcribed (IVT) crRNAs targeting the *lipL32* gene

To assemble the equimolar ratio of Forward and Reverse oligos (refer to the table above) for each target:

- Heat the reaction mix at 95°C for 5 minutes, followed by slow cooling at room temperature for 15 minutes.
- Perform *in vitro* transcription using a commercially available T7 Polymerase based IVT kit as per recommended protocol.

HI Scribe™ T7 High Yield RNA Synthesis Kit NEB #E2040S

| Reagent             | Amount (µL) | Concentration |
|---------------------|-------------|---------------|
| Nuclease-free water | 8.5         | -             |
| 10× Reaction Buffer | 1.5         | 0.75×         |
| ATP (MM)            | 1.5         | 7.5 mM        |

|                       |     |        |
|-----------------------|-----|--------|
| GTP (MM)              | 1.5 | 7.5 mM |
| UTP (MM)              | 1.5 | 7.5 mM |
| CTP (MM)              | 1.5 | 7.5 mM |
| Template DNA          | 2   | 1 µg   |
| T7 RNA Polymerase Mix | 2   | 10 mM  |
| Total Reaction Volume | 20  |        |

- Incubate at 37°C for 16 hrs (overnight).
- Add 1 ml of Turbo DNase to the reaction mixes and incubate at 37°C for 30 minutes.
- Heat inactivates at 70°C for 10 min.
- Optional: RNA can be visualised on a 2% agarose gel to check its integrity.

Column-based RNA clean-up as per the commercially provided protocols (Monarch® RNA Clean-up Kit Protocol (NEB #T2050S))

## 2. Generation of chimeric gRNAs (crRNA:tracrRNA-FITC).

| Reagents                                                                         | Volume (µL) | Final concentration |
|----------------------------------------------------------------------------------|-------------|---------------------|
| IVT synthesised crRNA                                                            | 5           | 1 µM                |
| FITC labelled tracrRNA                                                           | 5           | 1 µM                |
| Annealing Buffer<br>(100 mM NaCl, 50 mM Tris-Cl pH 8.0, 1 mM MgCl <sub>2</sub> ) | Up to 50µL  |                     |

Heat the reaction mix at 95°C for 5 minutes, followed by slow cooling at room temperature for 15 minutes.

## 3. CRISPR/Cas-based detection for *lipL32* gene by PCR

- *Leptospira* DNA.
- Set up a single-step PCR reaction.

| Reagents                                | Volume (µL) |
|-----------------------------------------|-------------|
| Forward Biotinylated Primer (10 mM)     | 1           |
| Reverse Biotinylated Primer (10 mM)     | 1           |
| Master mix                              | 12.5        |
| DNA sample (5 ng)                       | 1           |
| Total Volume (with nuclease-free water) | 20          |

**Reaction conditions**

|                      |    |       |
|----------------------|----|-------|
| Initial denaturation | 95 | 1min  |
| Denaturation         | 95 | 5 Sec |
| Annealing            | 60 | 10Sec |
| Polymerization       | 72 | 10Sec |
| Final Poly           | 72 | 1min  |
| Cycle                | 40 |       |
| Infinite             |    |       |

**4. Prepare dFnCas9-chimeric gRNA-RNP complexes for the samples to be tested.**

RNP complex against the *lipL-32* gene should be assembled for each sample. Incubate dFnCas9 protein with Chimeric FITC-labelled guides RNA to generate RNP complexes for 10 min at Room Temperature (RT).

| Reagents                                                                                                           | Volume (μL) | Final concentration |
|--------------------------------------------------------------------------------------------------------------------|-------------|---------------------|
| dFnCas9 protein (1 μM)                                                                                             | 1           | 100 nM              |
| Chimeric FITC-labelled gRNA (1 μM)                                                                                 | 1           | 100 nM              |
| Total Volume (Buffer containing 20 mM HEPES pH 7.5, 150mM KCl, 10% glycerol, 1mM DTT and 10 mM MgCl <sub>2</sub> ) | Up to 5     |                     |

- Add 5 μL of the biotinylated amplicon (from Step 3) to 5 μL of the dFnCas9-chimeric gRNA-RNP complex (Step 5).
- Incubate the reaction mix (containing RNP complex and amplicon) at 37°C for 10 min in a heating block or water bath.
- Add 90 μL of Lateral flow chase buffer to each tube containing 10 μL of the reaction mix from the previous step.
- After 15 minutes Insert the lateral flow strip directly into reaction tubes.
- Detect with the iQuant Instrument

Figure SI

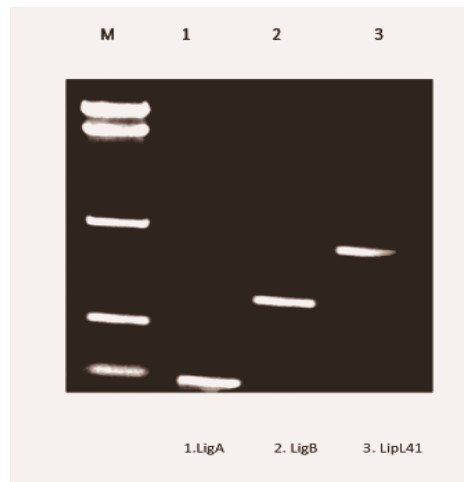

PCR for the *lig A*, *lig B*, *lipL41* and *lipL32* and the primers

|               |   |                                           | Size Bp |
|---------------|---|-------------------------------------------|---------|
| <i>lig A</i>  | F | GCATA C CAT GG CGTC CTC TAA TAC GGA TAT   | 1491    |
|               | R | ATA CTCGAG CGT AAC TGG AGT ATA AGA ACT CT |         |
|               |   |                                           |         |
| <i>lig B</i>  | F | ATATCCGGAATGAATTTTGGTGTA                  | 1041    |
|               | R | ATTTCAAGATTTGTTCTCCAGATTT                 |         |
|               |   |                                           |         |
| <i>lipL41</i> | F | GACCTCAGTAAACGCGCCGATAT                   | 427     |
|               | R | CAGCGGCTTCGTCCAATCCT                      |         |
